# Supplementary material
Source: bioRxiv or medRxiv preprint supplement (https://medrxiv.org/highwire/filestream/89061/field_highwire_adjunct_files/0/2020.07.10.20150557-1.pdf)
Supplement: Supplementary file [file 2020.07.10.20150557-1.pdf]

**A**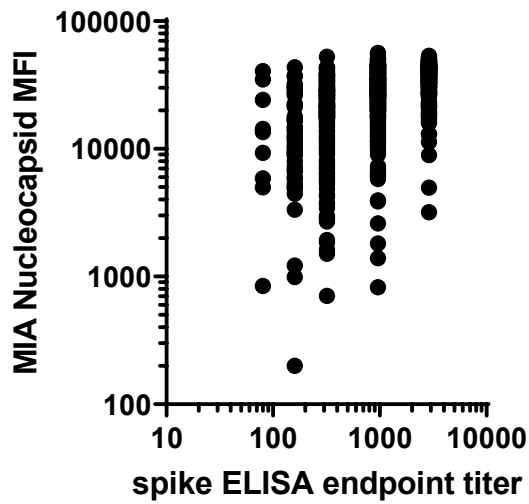**B**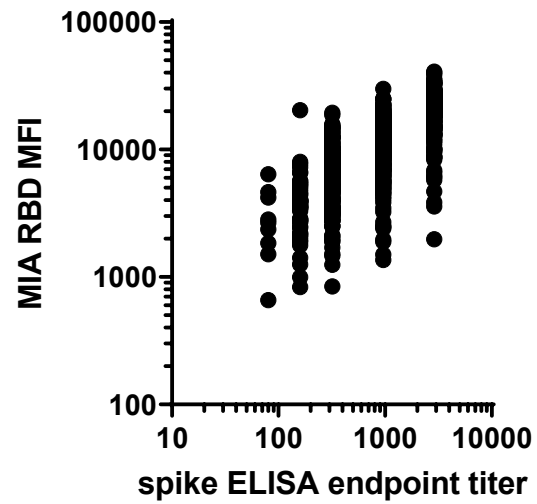

**Supplementary Figure 1. Comparison between Wadsworth Center MIA and MSH ELISA.** Serum samples were evaluated by ELISA and sent to the Wadsworth Center for MIA analysis. Individual MFI values for Abs reactive with the Nucleocapsid antigen (A) and the RBD antigen (B) were compared to ELISA endpoint titers. The Pearson Correlation Coefficient for the ELISA versus the N protein:  $r_2 = 0.29$ ,  $p < 0.0001$ ; ELISA versus RBD protein:  $r_2 = 0.54$ ,  $p < 0.0001$ .

**Supplementary Table 1. Comparison between Wadsworth Center MIA and MSH ELISA.**

| 2398 Tested                             |                 | NYS SARS CoV MIA |               |          |
|-----------------------------------------|-----------------|------------------|---------------|----------|
|                                         |                 | Positive         | Indeterminate | Negative |
| <b>MSH ELISA<br/>(RBD antigen)</b>      | <b>Positive</b> | 1120             | 199           | 249      |
|                                         | <b>Negative</b> | 29               | 19            | 782      |
| <b>Percent Agreement at 6 SD: 79.3%</b> |                 |                  |               |          |
| <b>Percent Agreement at 3 SD: 87.6%</b> |                 |                  |               |          |

| 1347 Tested                             |                 | NYS SARS CoV MIA |               |          |
|-----------------------------------------|-----------------|------------------|---------------|----------|
|                                         |                 | Positive         | Indeterminate | Negative |
| <b>MSH ELISA<br/>(RBD antigen)</b>      | <b>Positive</b> | 836              | 53            | 65       |
|                                         | <b>Negative</b> | 13               | 8             | 372      |
| <b>Percent Agreement at 6 SD: 89.7%</b> |                 |                  |               |          |
| <b>Percent Agreement at 3 SD: 90.6%</b> |                 |                  |               |          |

Serum samples were evaluated by ELISA and sent to the Wadsworth Center for MIA analysis. The MIA results were primarily reported based upon the SARS CoV-1 Nucleocapsid protein only (*top*) with a subset of specimens reported with both the Nucleocapsid and SARS-CoV-2 RBD proteins (*bottom*) as target antigens.

**Supplementary Table 2. SARS-CoV-2 Ab Titers in Convalescent Sera.**

| Day of Results | Number tested | COVID-19: Antibody Titers |              |              |              |
|----------------|---------------|---------------------------|--------------|--------------|--------------|
|                |               | 2880                      | 960          | 320          | <320         |
| 1              | 24            | 7                         | 6            | 8            | 6            |
| 2              | 47            | 7                         | 12           | 18           | 10           |
| 3              | 92            | 18                        | 23           | 34           | 17           |
| 4              | 223           | 47                        | 69           | 76           | 31           |
| 5              | 162           | 37                        | 50           | 63           | 12           |
| 6              | 138           | 48                        | 51           | 27           | 12           |
| 7              | 468           | 149                       | 148          | 127          | 44           |
| 8              | 278           | 84                        | 82           | 80           | 22           |
| 9              | 225           | 71                        | 81           | 56           | 17           |
| Total          | 1657          | 468                       | 532          | 489          | 168          |
| <b>Percent</b> | <b>100%</b>   | <b>28.2%</b>              | <b>32.1%</b> | <b>29.5%</b> | <b>10.1%</b> |

Serum specimens from COVID-19 convalescent patients were screened at a 1:50 dilution for SARS-CoV-2 RBD reactivity using ELISA. Specimens reactive in the screen were then further tested by ELISA over a range of dilutions. The indicated titers are inverse dilutions of endpoint reactivity. Specimens were collected and assayed each day and individual days' results from a representative sampling of days are shown here.
